# Supplementary material for: Familial Risks and Proportions Describing Population Landscape of Familial Cancer
Source: MDPI journal article supplement (doi:10.3390/cancers13174385), 2021-08-30
Supplement: s1 [file s1]

**Supplementary tables:**

Supplementary Table 1. Age-specific incidence rate and rate ratio of stomach and colorectal cancer in population with and without family history of concordant cancer

Supplementary Table 2. Age-specific incidence rate and rate ratio of pancreas and lung cancer in population with and without family history of concordant cancer

Supplementary Table. Age-specific incidence rate and rate ratio of female breast and endometrium cancer in population with and without family history of concordant cancer

Supplementary Table. Age-specific incidence rate and rate ratio of prostate and kidney (Renal parenchyma) cancer in population with and without family history of concordant cancer

Supplementary Table. Age-specific incidence rate and rate ratio of bladder (Urinary bladder) cancer and melanoma in population with and without family history of concordant cancer

**Supplementary Table 1. Age-specific incidence rate and rate ratio of stomach and colorectal cancer in population with and without family history of concordant cancer**

| Age at diagnosis (years) | Stomach                                 |              |                                    |        |      | Colorectum                              |              |                                    |        |     |
|--------------------------|-----------------------------------------|--------------|------------------------------------|--------|------|-----------------------------------------|--------------|------------------------------------|--------|-----|
|                          | Incidence rate per 100 000 person years |              | Rate ratio (Familial/Non-familial) |        |      | Incidence rate per 100 000 person years |              | Rate ratio (Familial/Non-familial) |        |     |
|                          | Familial                                | Non-familial | RR                                 | 95% CI |      | Familial                                | Non-familial | RR                                 | 95% CI |     |
|                          |                                         |              |                                    |        |      |                                         |              |                                    |        |     |
| 20-24                    | 0.4                                     | 0.1          | 4.2                                | 1.0    | 17.4 | 1.4                                     | 1.2          | 1.2                                | 0.8    | 1.7 |
| 25-29                    | 1.2                                     | 0.2          | 5.2                                | 2.2    | 12.0 | 2.9                                     | 1.8          | 1.6                                | 1.2    | 2.1 |
| 30-34                    | 0.4                                     | 0.4          | 0.9                                | 0.2    | 3.8  | 5.2                                     | 2.5          | 2.1                                | 1.7    | 2.6 |
| 35-39                    | 1.7                                     | 0.8          | 2.1                                | 1.0    | 4.3  | 9.2                                     | 4.4          | 2.1                                | 1.8    | 2.5 |
| 40-44                    | 3.2                                     | 1.6          | 2.0                                | 1.2    | 3.3  | 19.1                                    | 8.3          | 2.3                                | 2.0    | 2.6 |
| 45-49                    | 7.7                                     | 3.0          | 2.5                                | 1.8    | 3.6  | 29.5                                    | 14.8         | 2.0                                | 1.8    | 2.2 |
| 50-54                    | 10.0                                    | 5.1          | 2.0                                | 1.4    | 2.7  | 55.6                                    | 28.4         | 2.0                                | 1.8    | 2.1 |
| 55-59                    | 17.1                                    | 9.0          | 1.9                                | 1.5    | 2.4  | 91.8                                    | 51.4         | 1.8                                | 1.7    | 1.9 |
| 60-64                    | 26.2                                    | 12.7         | 2.1                                | 1.6    | 2.6  | 146.9                                   | 87.9         | 1.7                                | 1.6    | 1.8 |
| 65-69                    | 35.7                                    | 18.3         | 1.9                                | 1.6    | 2.4  | 213.7                                   | 134.5        | 1.6                                | 1.5    | 1.7 |
| 70-74                    | 31.6                                    | 24.1         | 1.3                                | 1.0    | 1.8  | 315.9                                   | 192.1        | 1.6                                | 1.5    | 1.8 |
| 75-79                    | 48.3                                    | 26.8         | 1.8                                | 1.2    | 2.6  | 434.8                                   | 268.2        | 1.6                                | 1.5    | 1.8 |
| 80-84                    | 44.7                                    | 33.6         | 1.3                                | 0.6    | 3.0  | 427.9                                   | 338.0        | 1.3                                | 1.1    | 1.5 |

RR: Rate ratio; CI: confidence interval.

**Supplementary Table 2. Age-specific incidence rate and rate ratio of pancreas and lung cancer in population with and without family history of concordant cancer**

| Age at diagnosis (years) | Pancreas                                |              |     |                                    |        |  | Lung                                    |              |                                    |     |        |  |
|--------------------------|-----------------------------------------|--------------|-----|------------------------------------|--------|--|-----------------------------------------|--------------|------------------------------------|-----|--------|--|
|                          | Incidence rate per 100 000 person years |              |     | Rate ratio (Familial/Non-familial) |        |  | Incidence rate per 100 000 person years |              | Rate ratio (Familial/Non-familial) |     |        |  |
|                          | Familial                                | Non-familial |     | RR                                 | 95% CI |  | Familial                                | Non-familial |                                    | RR  | 95% CI |  |
|                          |                                         |              |     |                                    |        |  |                                         |              |                                    |     |        |  |
| 20-24                    | 0.2                                     | 0.1          | 4.5 | 0.6                                | 34.1   |  | 0.2                                     | 0.2          | 1.1                                | 0.4 | 3.7    |  |
| 25-29                    | 0.7                                     | 0.1          | 9.2 | 2.7                                | 30.8   |  | 0.8                                     | 0.4          | 2.1                                | 1.1 | 4.0    |  |
| 30-34                    | 1.0                                     | 0.2          | 6.1 | 2.2                                | 16.9   |  | 0.7                                     | 0.6          | 1.2                                | 0.6 | 2.4    |  |
| 35-39                    | 0.2                                     | 0.4          | 0.6 | 0.1                                | 4.1    |  | 2.6                                     | 1.2          | 2.1                                | 1.4 | 3.0    |  |
| 40-44                    | 2.9                                     | 1.1          | 2.7 | 1.5                                | 5.0    |  | 7.7                                     | 3.0          | 2.6                                | 2.1 | 3.3    |  |
| 45-49                    | 6.9                                     | 2.5          | 2.8 | 1.8                                | 4.1    |  | 19.3                                    | 8.1          | 2.4                                | 2.1 | 2.8    |  |
| 50-54                    | 14.6                                    | 6.0          | 2.5 | 1.8                                | 3.3    |  | 47.2                                    | 18.6         | 2.5                                | 2.3 | 2.8    |  |
| 55-59                    | 29.8                                    | 12.0         | 2.5 | 2.0                                | 3.1    |  | 84.0                                    | 38.9         | 2.2                                | 2.0 | 2.3    |  |
| 60-64                    | 40.5                                    | 19.7         | 2.1 | 1.7                                | 2.5    |  | 154.6                                   | 68.6         | 2.3                                | 2.1 | 2.4    |  |
| 65-69                    | 53.5                                    | 29.8         | 1.8 | 1.4                                | 2.2    |  | 239.4                                   | 102.9        | 2.3                                | 2.2 | 2.5    |  |
| 70-74                    | 73.4                                    | 41.6         | 1.8 | 1.4                                | 2.2    |  | 287.3                                   | 138.2        | 2.1                                | 1.9 | 2.3    |  |
| 75-79                    | 67.3                                    | 50.5         | 1.3 | 0.9                                | 1.9    |  | 306.3                                   | 154.7        | 2.0                                | 1.7 | 2.2    |  |
| 80-84                    | 187.8                                   | 57.4         | 3.3 | 2.0                                | 5.5    |  | 286.8                                   | 167.8        | 1.7                                | 1.3 | 2.3    |  |

RR: Rate ratio; CI: confidence interval.

**Supplementary Table 3. Age-specific incidence rate and rate ratio of breast (women) and endometrium cancer in population with and without family history of concordant cancer**

| Age at diagnosis (years) | Breast (women)                          |              |                                    |        |     | Endometrium                             |              |                                    |        |      |
|--------------------------|-----------------------------------------|--------------|------------------------------------|--------|-----|-----------------------------------------|--------------|------------------------------------|--------|------|
|                          | Incidence rate per 100 000 person years |              | Rate ratio (Familial/Non-familial) |        |     | Incidence rate per 100 000 person years |              | Rate ratio (Familial/Non-familial) |        |      |
|                          | Familial                                | Non-familial | RR                                 | 95% CI |     | Familial                                | Non-familial | RR                                 | 95% CI |      |
|                          |                                         |              |                                    |        |     |                                         |              |                                    |        |      |
| 20-24                    | 1.3                                     | 0.5          | 2.5                                | 1.4    | 4.3 |                                         | 0.1          |                                    |        |      |
| 25-29                    | 9.7                                     | 3.7          | 2.6                                | 2.1    | 3.2 | 0.8                                     | 0.3          | 2.9                                | 0.7    | 12.2 |
| 30-34                    | 30.7                                    | 14.5         | 2.1                                | 1.9    | 2.4 | 1.6                                     | 0.8          | 1.9                                | 0.7    | 5.3  |
| 35-39                    | 69.1                                    | 36.3         | 1.9                                | 1.8    | 2.1 | 4.5                                     | 2.3          | 2.0                                | 1.1    | 3.6  |
| 40-44                    | 162.2                                   | 80.7         | 2.0                                | 1.9    | 2.1 | 15.3                                    | 4.8          | 3.2                                | 2.2    | 4.4  |
| 45-49                    | 283.6                                   | 152.4        | 1.9                                | 1.8    | 1.9 | 36.6                                    | 12.4         | 2.9                                | 2.3    | 3.7  |
| 50-54                    | 359.5                                   | 203.9        | 1.8                                | 1.7    | 1.8 | 59.0                                    | 27.6         | 2.1                                | 1.8    | 2.6  |
| 55-59                    | 413.2                                   | 239.7        | 1.7                                | 1.7    | 1.8 | 95.9                                    | 50.8         | 1.9                                | 1.6    | 2.2  |
| 60-64                    | 506.4                                   | 303.6        | 1.7                                | 1.6    | 1.7 | 134.7                                   | 66.0         | 2.0                                | 1.7    | 2.4  |
| 65-69                    | 599.3                                   | 356.6        | 1.7                                | 1.6    | 1.8 | 133.8                                   | 87.1         | 1.5                                | 1.3    | 1.8  |
| 70-74                    | 614.9                                   | 382.6        | 1.6                                | 1.5    | 1.7 | 159.1                                   | 98.4         | 1.6                                | 1.3    | 2.0  |
| 75-79                    | 453.8                                   | 257.9        | 1.8                                | 1.6    | 2.0 | 181.4                                   | 111.2        | 1.6                                | 1.2    | 2.3  |
| 80-84                    | 442.3                                   | 343.3        | 1.3                                | 1.0    | 1.7 | 193.1                                   | 137.1        | 1.4                                | 0.7    | 2.8  |

RR: Rate ratio; CI: confidence interval.

**Supplementary Table 4. Age-specific incidence rate and rate ratio of prostate and kidney cancer in population with and without family history of concordant cancer**

| Age at diagnosis (years) | Prostate                                      |                  |                                           |        |     | Kidney                                        |                  |                                       |        |      |
|--------------------------|-----------------------------------------------|------------------|-------------------------------------------|--------|-----|-----------------------------------------------|------------------|---------------------------------------|--------|------|
|                          | Incidence rate per<br>100 000 person<br>years |                  | Rate ratio<br>(Familial/Non-<br>familial) |        |     | Incidence rate per<br>100 000 person<br>years |                  | Rate ratio<br>(Familial/Non-familial) |        |      |
|                          | Familial                                      | Non-<br>familial | RR                                        | 95% CI |     | Familial                                      | Non-<br>familial | RR                                    | 95% CI |      |
|                          |                                               |                  |                                           |        |     |                                               |                  |                                       |        |      |
| 20-24                    |                                               | 0.0              |                                           |        |     | 0.3                                           | 0.1              | 2.7                                   | 0.4    | 20.1 |
| 25-29                    |                                               | 0.0              |                                           |        |     | 1.4                                           | 0.2              | 5.8                                   | 2.3    | 14.4 |
| 30-34                    |                                               | 0.0              |                                           |        |     | 1.7                                           | 0.4              | 3.8                                   | 1.7    | 8.6  |
| 35-39                    | 0.4                                           | 0.1              | 3.4                                       | 1.2    | 9.7 | 2.3                                           | 1.1              | 2.0                                   | 1.0    | 4.1  |
| 40-44                    | 6.1                                           | 1.0              | 6.0                                       | 4.4    | 8.1 | 4.2                                           | 2.3              | 1.9                                   | 1.1    | 3.2  |
| 45-49                    | 33.6                                          | 7.8              | 4.3                                       | 3.8    | 4.9 | 10.4                                          | 4.4              | 2.4                                   | 1.7    | 3.4  |
| 50-54                    | 155.5                                         | 47.0             | 3.3                                       | 3.1    | 3.5 | 17.1                                          | 7.4              | 2.3                                   | 1.7    | 3.1  |
| 55-59                    | 476.0                                         | 165.5            | 2.9                                       | 2.8    | 3.0 | 25.2                                          | 11.9             | 2.1                                   | 1.6    | 2.7  |
| 60-64                    | 1019.3                                        | 413.5            | 2.5                                       | 2.4    | 2.5 | 32.6                                          | 16.0             | 2.0                                   | 1.6    | 2.6  |
| 65-69                    | 1626.7                                        | 753.6            | 2.2                                       | 2.1    | 2.2 | 32.7                                          | 21.0             | 1.6                                   | 1.2    | 2.1  |
| 70-74                    | 1748.3                                        | 918.8            | 1.9                                       | 1.8    | 2.0 | 31.1                                          | 26.1             | 1.2                                   | 0.8    | 1.8  |
| 75-79                    | 1577.9                                        | 945.0            | 1.7                                       | 1.6    | 1.8 | 61.4                                          | 26.2             | 2.3                                   | 1.5    | 3.7  |
| 80-84                    | 1556.5                                        | 955.5            | 1.6                                       | 1.4    | 1.9 | 63.0                                          | 29.8             | 2.1                                   | 0.8    | 5.7  |

RR: Rate ratio; CI: confidence interval.

**Supplementary Table 5. Age-specific incidence rate and rate ratio of bladder cancer and melanoma in population with and without family history of concordant cancer**

| Age at diagnosis (years) | Bladder                                 |              |                                    |        |     | Melanoma                                |              |                                    |        |     |
|--------------------------|-----------------------------------------|--------------|------------------------------------|--------|-----|-----------------------------------------|--------------|------------------------------------|--------|-----|
|                          | Incidence rate per 100 000 person years |              | Rate ratio (Familial/Non-familial) |        |     | Incidence rate per 100 000 person years |              | Rate ratio (Familial/Non-familial) |        |     |
|                          | Familial                                | Non-familial | RR                                 | 95% CI |     | Familial                                | Non-familial | RR                                 | 95% CI |     |
|                          |                                         |              |                                    |        |     |                                         |              |                                    |        |     |
| 20-24                    | 0.4                                     | 0.3          | 1.4                                | 0.5    | 4.5 | 8.0                                     | 3.2          | 2.5                                | 1.9    | 3.2 |
| 25-29                    | 1.0                                     | 0.5          | 2.3                                | 1.1    | 4.6 | 18.8                                    | 5.7          | 3.3                                | 2.8    | 3.9 |
| 30-34                    | 1.7                                     | 0.7          | 2.4                                | 1.4    | 4.2 | 22.8                                    | 9.4          | 2.4                                | 2.1    | 2.8 |
| 35-39                    | 2.2                                     | 1.4          | 1.5                                | 0.9    | 2.5 | 34.8                                    | 13.7         | 2.5                                | 2.2    | 2.9 |
| 40-44                    | 5.4                                     | 3.0          | 1.8                                | 1.3    | 2.6 | 50.5                                    | 18.9         | 2.7                                | 2.4    | 3.0 |
| 45-49                    | 10.5                                    | 5.5          | 1.9                                | 1.5    | 2.4 | 57.9                                    | 24.1         | 2.4                                | 2.1    | 2.7 |
| 50-54                    | 21.4                                    | 10.7         | 2.0                                | 1.7    | 2.4 | 69.2                                    | 28.5         | 2.4                                | 2.2    | 2.7 |
| 55-59                    | 37.8                                    | 20.3         | 1.9                                | 1.6    | 2.2 | 84.5                                    | 35.7         | 2.4                                | 2.1    | 2.7 |
| 60-64                    | 70.7                                    | 35.3         | 2.0                                | 1.8    | 2.3 | 120.4                                   | 44.5         | 2.7                                | 2.4    | 3.0 |
| 65-69                    | 97.3                                    | 55.4         | 1.8                                | 1.5    | 2.0 | 160.9                                   | 57.5         | 2.8                                | 2.5    | 3.2 |
| 70-74                    | 148.0                                   | 82.9         | 1.8                                | 1.6    | 2.1 | 159.6                                   | 69.3         | 2.3                                | 2.0    | 2.7 |
| 75-79                    | 177.8                                   | 109.1        | 1.6                                | 1.3    | 2.0 | 223.2                                   | 89.2         | 2.5                                | 2.0    | 3.1 |
| 80-84                    | 235.3                                   | 135.8        | 1.7                                | 1.2    | 2.5 | 242.1                                   | 118.8        | 2.0                                | 1.2    | 3.4 |

RR: Rate ratio; CI: confidence interval.
